# Supplementary material
Source: publisher figshare collection journal article supplement (https://karger.figshare.com/ndownloader/files/26180768)
Supplement: Supplementary file 1 [file 26180768]

**Supplemental Table 1. Pretreatment factors associated with BMI changes after radiodine therapy**

| Mean posttreatment BMI change (kg/m²) | | | |
| --- | --- | --- | --- |
|  | **β** | **95% CI** | **P-value** |
| *Univariate analysis* | | | |
| Age (years) | -0.184 | 0.110; 3.959 | 0.151 |
| Sex: female | 0.010 | -0.625; 0.676 | 0.938 |
| BMI (kg/m²) | 0.046 | -0.052; 0.075 | 0.724 |
| Smoking | 0.057 | -0.713; 1.093 | 0.675 |
| Statin treatment | -0.181 | -1.095; 0.185 | 0.160 |
| Diabetes | -0.017 | -0.718; 0.631 | 0.898 |
| Thyroid autoimmunity | -0.134 | -1.167; 0.485 | 0.409 |
| TSH (mU/L) | -0.350 | -7.628; -1.326 | **0.005** |
| FT4 (pmol/L) | 0.181 | -0.035; 0.208 | 0.158 |
| FT3 (pmol/L) | 0.169 | -0.149; 0.680 | 0.205 |
| Thyroid volume (mL) | -0.066 | -0.012; 0.008 | 0.643 |
| 131I activity (MBq) | 0.190 | -0.021; 0.141 | 0.146 |
| *Multivariate analysis** |  |  |  |
| Age | -0.216 | -0.054; 0.004 | 0.089 |
| Statin treatment | 0.027 | -0.604; 0.742 | 0.838 |
| TSH (mU/L) | -0.367 | -7.905; -1.367 | **0.006** |
| FT4 (pmol/L) | 0.126 | -0.056; 0.177 | 0.306 |
| 131I activity (MBq) | 0.181 | -0.020; 0.134 | 0.145 |

*multiple linear regression model, p <0.017, R2 0.220
